# Supplementary material for: Effect of Oxylipins, Terpenoid Precursors and Wounding on Soft Corals’ Secondary Metabolism as Analyzed via UPLC/MS and Chemometrics
Source: PubMed Central journal article supplement (PMC6149794; doi:10.3390/molecules22122195), 2017-12-10

# Suppl. Fig. S1

Tandem MSMS spectra of diepoxy-cembratriene,  $C_{20}H_{31}O_2$ ,  $m/z$  303.2314  $[M+H]^+$  (A) and campest-ene-triol,  $C_{28}H_{49}O_3$ ,  $m/z$  433.36737  $[M+H]^+$  (B).

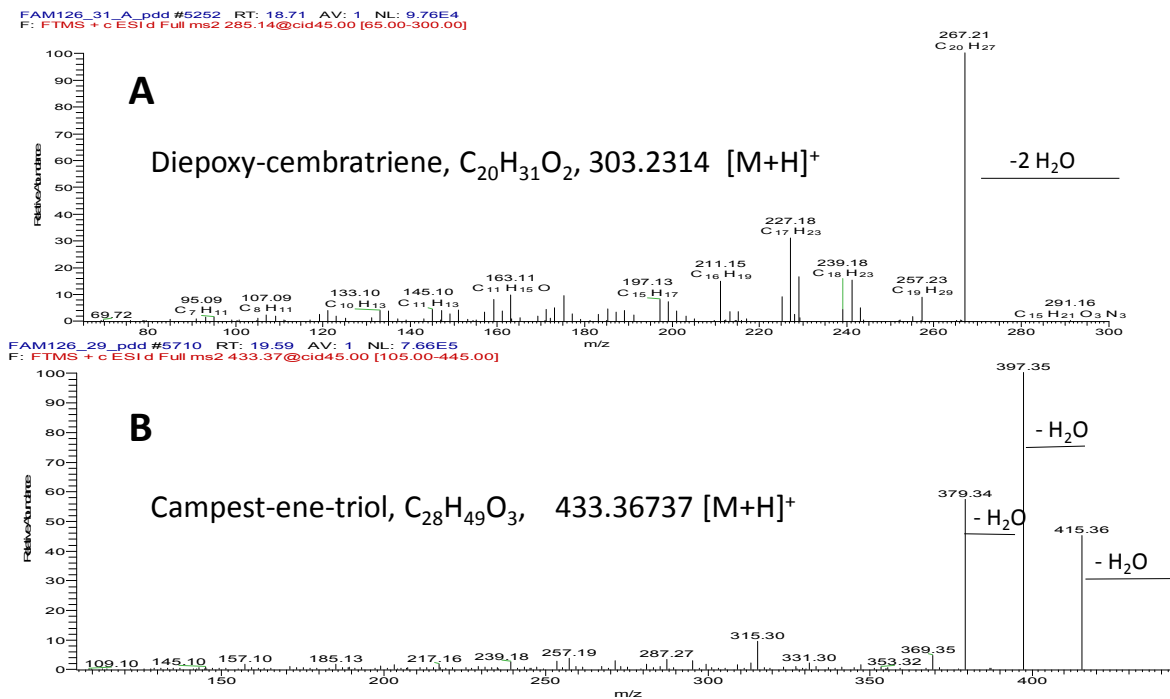

Supplement: molecules-22-02195-s001.pdf [file molecules-22-02195-s001.pdf]
